# Supplementary material for: Developing a Research Instrument to Document Awareness, Knowledge, and Attitudes Regarding Breast Cancer and Early Detection Techniques for Pakistani Women: The Breast Cancer Inventory (BCI)
Source: Diseases. 2016 Dec 9;4(4):37. doi: 10.3390/diseases4040037 (PMC5456323; doi:10.3390/diseases4040037)
Supplement: Supplementary file 1 [file diseases-04-00037-s001.pdf]

# Supplementary Materials: Developing a Research Instrument to Document Awareness, Knowledge, and Attitudes Regarding Breast Cancer, and Early Detection Techniques for Pakistani Women: The Breast Cancer Inventory (BCI)

Atta Abbas Naqvi, Fatima Zehra, Rizwan Ahmad and Niyaz Ahmad

Table S1. Scoring criteria for BCI.

| Serial Number | Research Variable                               | Categories Available                                                                                                                         | Grading |
|---------------|-------------------------------------------------|----------------------------------------------------------------------------------------------------------------------------------------------|---------|
| 1.            | Do you know what breast cancer is?              | Yes                                                                                                                                          | 2       |
|               |                                                 | No                                                                                                                                           | 0       |
|               |                                                 | Yes, but I am not sure                                                                                                                       | 1       |
|               |                                                 | Established symptom according to identified standards                                                                                        | 3       |
| 2.            | What is the most common symptom of BC? ***      | (2) or more answers, all of which are established symptoms according to identified standards                                                 | 3       |
|               |                                                 | (2) answers, one of which is an established symptom according to identified standards and the other is not established, but has a likelihood | 2       |
|               |                                                 | (2) answers, one of which is an established symptom and the other is a wrong answer                                                          | 1.5     |
|               |                                                 | (1) or more answers, both of which are not established symptoms but are not wrong                                                            | 1.5     |
|               |                                                 | Answers which are neither established according to identified standards nor possess a likelihood i.e., wrong answers                         | 0       |
| 3.            | Do you know about the breast cancer screening?  | Yes                                                                                                                                          | 2       |
|               |                                                 | No                                                                                                                                           | 0       |
|               |                                                 | Yes, but I am not sure                                                                                                                       | 1       |
| 4.            | Do you know about BC physical self examination? | Yes                                                                                                                                          | 2       |
|               |                                                 | No                                                                                                                                           | 0       |
|               |                                                 | Yes, but I am not sure                                                                                                                       | 1       |

Table S1. Cont.

| Serial Number | Research Variable                                          | Categories Available                                                                                                                             | Grading |
|---------------|------------------------------------------------------------|--------------------------------------------------------------------------------------------------------------------------------------------------|---------|
| 5.            | Are you aware of mammography?                              | Yes                                                                                                                                              | 2       |
|               |                                                            | No                                                                                                                                               | 0       |
|               |                                                            | Yes, but I am not sure                                                                                                                           | 1       |
| 6.            | What is the most common risk factor of BC? ***             | Established risk factors according to identified standards                                                                                       | 3       |
|               |                                                            | (2) or more answers, all of which are established risk factors according to identified standards                                                 | 3       |
|               |                                                            | (2) answers, one of which is an established risk factors according to identified standards and the other is not established but has a likelihood | 2       |
|               |                                                            | (2) answers, one of which is an established risk factor and the other is a wrong answer                                                          | 1.5     |
|               |                                                            | (1) or more answers, both of which are not established risk factors but are not wrong                                                            | 1.5     |
|               |                                                            | Answers which are neither established according to identified standards nor possess a likelihood i.e., wrong answers                             | 0       |
| 7.            | Are you aware of breast cancer treatment?                  | Yes                                                                                                                                              | 2       |
|               |                                                            | No                                                                                                                                               | 0       |
|               |                                                            | Yes, but I am not sure                                                                                                                           | 1       |
| 8.            | Can breast cancer spread to any other part of the body?    | Yes                                                                                                                                              | 2       |
|               |                                                            | No                                                                                                                                               | 0       |
|               |                                                            | Yes, but I am not sure                                                                                                                           | 1       |
| 9.            | Can obesity increase the risk of breast cancer?            | Yes                                                                                                                                              | 2       |
|               |                                                            | No                                                                                                                                               | 0       |
|               |                                                            | Yes, but I am not sure                                                                                                                           | 1       |
| 10.           | Do you know how to perform a BC physical self examination? | Yes                                                                                                                                              | 2       |
|               |                                                            | No                                                                                                                                               | 0       |
|               |                                                            | Yes, but I am not sure                                                                                                                           | 1       |

\*\*\* Standards identified; National Breast Cancer Foundation USA [1], Canadian Cancer Society [2]).

## References

1. National Breast Cancer Foundation, Inc., USA. Symptoms and signs. 2016. Available online: <http://www.nationalbreastcancer.org/breast-cancer-symptoms-and-signs> (accessed on 7 December 2016).
2. Canadian Cancer Society. Signs and symptoms of breast cancer. 2016. Available online: <http://www.cancer.ca/en/cancer-information/cancer-type/breast/signs-and-symptoms/?region=bc> (accessed on 7 December 2016).
